# Supplementary material
Source: Elsevier journal article supplement (https://www.sciencedirect.com/science/article/pii/S1130239918300592)
Supplement: mmc1 [file S1130239918300592:mmc1.docx]

**Encuesta para profesionales de la salud**

Categoría profesional: Médico/a Enfermero/a

Unidad: UCI Semicríticos Urgencias

Hospitalización

Otros

Experiencia profesional en la unidad años

Experiencia en ventilación mecánica no invasiva (VNI): años

Año de licenciatura/diplomatura/grado

**Evaluación de conocimientos en relación a la ventilación mecánica no invasiva (VNI):**

1. ¿Cuáles son las indicaciones para la VNI?
2. Insuficiencia respiratoria aguda en pacientes con enfermedad pulmonar obstructiva crónica (EPOC), edema agudo de pulmón (EAP), en inmunodeprimidos o en el postoperatorio
3. Pacientes con síndrome distrés respiratorio agudo (SDRA) y/o EPOC
4. Pacientes con pH<7.15
5. a y b son ciertas
6. No contesto

Respuesta correcta: a). EPOC y EAP tienen nivel de indicación grado 1A, en inmunodeprimidos con insuficiencia respiratoria aguda (IRA) la indicación es de grado 2B (Keenan et al., 2011). Por pacientes con SDRA se recomienda precaución con la VNI (Nava, 2013, Nava and Hill, 2009).

1. ¿Cuáles son los criterios para iniciar la VNI en la UCI?
2. No mejora de signos y síntomas después de 2horas de VNI fuera de la UCI
3. Insuficiencia respiratoria que requiere FiO2>0,4
4. Escasa experiencia de la plantilla de médicos y enfermeras en hospitalización
5. Todas son ciertas
6. No contesto

Respuesta correcta: d). Cuando no mejoran los signos y síntomas de la IRA o insuficiencia respiratoria crónica reagudizada (IRCA) después de 2h de aplicación de la VNI, indica fallo de la terapia y necesidad estricta de monitorage para no demorar la intubación traqueal y ventilación mecánica invasiva (Bello et al., 2013, Chandra et al., 2012 Esteban et al., 2013). Requerimientos elevados de oxígeno indican insuficiencia respiratoria severa por lo que es necesario un equipo de profesionales entrenado y experimentado con la terapia, y un ratio enfermera: paciente adecuado para un paciente crítico (Hill, 2009, Medina et al., 2009).

1. Son indicadores de fracaso de la VNI:
2. Incapacidad para mejorar los síntomas (principalmente frecuencia respiratoria, FR)
3. Desincronización con el ventilador
4. pH>7,35
5. a y b son ciertas
6. No contesto

Respuesta correcta: d). Como en la respuesta previa, la no mejora de los signos y síntomas de la IRA/IRCA después de 2h de VNI, indica fallo de la terapia. La falta de sincronía paciente-ventilador es un predictor de fallo de la VNI, principalmente en pacientes con IRCA (Bello et al., 2013, Hill, 2009). Un pH > 7,35 permite iniciar la VNI en las salas de hospitalización, porque se trata de un paciente estable (Burns et al., 2013, Plant et al., 2000).

1. La presión de soporte administrada durante la VNI con una modalidad BIPAP:
2. Es la suma de les presiones entre la presión positiva al final de la espiración (EPAP) y la presión positiva en la inspiración (IPAP)
3. La diferencia de presión entre IPAP y EPAP
4. La presión máxima conseguida en la vía aérea
5. No existe presión de soporte en la VNI
6. No contesto

Respuesta correcta: b) En ventiladores convencionales de UCI, la máxima presión en la vía aérea es la suma de la presión de soporte más PEEP (Positive End Expiratory Pressure), equivalente a la EPAP en ventiladores específicos de VNI. En la modalidad BIPAP (solo disponible en ventiladores específicos de VNI) el nivel máximo de presión en la vía aérea es la IPAP, por lo que la presión de soporte es la diferencia entre IPAP y EPAP (igual que PEEP pero para específicos). Si es necesario aumentar EPAP para mejorar el reclutamiento alveolar, debe considerarse aumentar también IPAP, o por el contrario, se estará reduciendo la presión de soporte. La presión de soporte no existe en la modalidad CPAP (Continuous Positive Airway Pressure) pero si en la BIPAP, aunque ambas son modalidades de VNI (Medina et al., 2009).

1. Para mejorar la eficacia de la VNI se deben modificar los parámetros del ventilador de la siguiente manera:
2. Aumentar IPAP 2cmH2O cada 5 minutos en función del volumen corriente resultante
3. Aumentar FiO2
4. Aumentar EPAP según reclutamiento
5. a y c son ciertas
6. No contesto

Respuesta correcta: d). El nivel de presión de soporte y la magnitud de las fugas no intencionadas son dos factores predictivos de severa asincronía. Por ello, es importante individualizar EPAP y EPAP para obtener un nivel óptimo de presión en la vía aérea que facilite la sincronización paciente-ventilador (Pisani et al., 2012). Incrementar EPAP mejora el reclutamiento alveolar por lo que disminuye la hipoxemia. Incrementar la FiO2 debe ser el último recurso, y es más, no todos los ventiladores específicos de VNI permiten administrar oxígeno (Medina et al., 2009, Nava and Hill, 2009).

1. La programación de los ventiladores específicos de VNI es:
2. Modalidad S/T (espontanea-temporizada) siempre
3. Rampa intermedia
4. Trigger espiratorio 40-70% del flujo
5. Ninguna es cierta
6. No contesto

Respuesta correcta: d). Solo algunos ventiladores de UCI, y las más modernas versiones de los específicos de VNI, permiten programar la sensibilidad del trigger espiratorio. La rampa determina el “rise time”, el tiempo necesario para conseguir el máximo nivel de presión en la vía aérea, el cuál debería ser individualizado según las características del paciente, dependiendo de si la insuficiencia respiratoria es obstructiva o restrictiva, pues no hacerlo será causa de asincronía. La modalidad S/T es la más usada porqué permite administrar presión de soporte para disminuir el esfuerzo inspiratorio del paciente, y al mismo tiempo, garantiza un número de respiraciones mínimas si la FR del paciente disminuye por debajo del mínimo previsto. En algunas enfermedades, como EAP, la modalidad de CPAP está indicada, aunque no permita administrar presión de soporte (Medina et al., 2009).

1. Son estrategias para facilitar la sincronización del paciente con el ventilador:
2. Sellar la interfaz a la cara del paciente para que no haya fugas y tapar el orificio de la máscara por donde escapa el aire
3. Cambiar el ventilador a modalidad S/T(espontánea-temporizada) o A/C(asistida-controlada) según tipo de ventilador, con una FR similar a la espontanea del paciente
4. Aplicar PEEP (presión positiva al final de la espiración) externa o aumentar-la
5. b y c son ciertas
6. No contesto

Respuesta correcta: d). Apretar la máscara contra la cara del paciente para reducir la fuga no intencionada (entre máscara y piel de la cara del paciente) empeorará el confort del paciente con la máscara, pudiendo ser motivo de retirada de la VNI, y además aumentará el riesgo de úlceras en la piel. La fuga intencionada (a través del puerto exhalatorio incorporado en el codo de la mascarilla) es necesaria para lavar el dióxido de carbono, pues se debe usar esta mascarilla en ventiladores con una sola rama para evitar la reinhalación (Nava et al., 2009, Pisani et al., 2012).

El modo S/T es frecuente porque permite administrar presión de soporte, al contrario que la modalidad CPAP, lo que disminuye el trabajo respiratorio del paciente. Aplicar y/o aumentar PEEP permite compensar la PEEP intrínseca, evitando disparo inefectivo del trigger inspiratorio con lo que se reduce el esfuerzo inspiratorio del paciente (Di Marco et al., 2011, Louis et al., 2010, Medina et al., 2009).

1. Son factores predictivos de éxito de la VNI:
2. Mejora del pH, pCO2 y PaO2/FiO2 a las 2 horas de inicio de la VNI respecto los valores iniciales
3. Disminución de la FR y del tiraje
4. Aumento del volumen corriente espirado
5. Todas son ciertas
6. No contesto

Respuesta correcta: d). La ausencia de mejora gasométrica (acidosis persistente e hipercapnia) y/o no mejora respiratoria (taquipnea y tiraje) durante las dos primeras horas de la terapia es un predictor de fallo de la misma en pacientes con insuficiencia respiratoria crónica agudizada (IRCA). En la insuficiencia respiratoria aguda (IRA) es factor predictivo la no mejora del coeficiente PaFi (PaO2/FiO2<175 mmHg) después de la primera hora de VNI (Hill, 2009, Chandra et al., 2012). Otros indicadores son el aumento del volumen tidal o minuto espirado, teniendo en cuenta sin embargo que es un parámetro calculado a partir de las curvas de flujo; en condiciones de fugas excesivas puede estar totalmente sobrestimado (Hill, Medina et al., 2009).

1. Son complicaciones de la VNI:
2. Agitación del paciente
3. Desadaptación paciente-ventilador
4. Atelectasias
5. Totes son ciertas
6. No contesto

Respuesta correcta: a). Cuando ocurre durante la terapia, la agitación es una complicación que puede conllevar retirada de la VNI, dependiendo del grado en que se presente. Se debe valorar con una escala de Likert que permita evaluar des del disconfort relativo a la agitación severa, la cual provoca desplazamiento de la máscara y aumento de la fuga no intencionada. En consecuencia habrá mayor asincronía paciente-ventilador, que es, como se ha comentado en la respuesta previa, un factor predictivo de fallo de VNI, especialmente en la IRCA (Bello et al., 2013, Hilbert et al., 2012, Hill, 2009). Una indicación de la VNI es tratar atelectasias (Medina et al., 2009).

1. En la insuficiencia respiratoria aguda la interfaz más adecuada es:
2. Mascarilla buconasal siempre
3. Mascarilla nasal
4. Mascarilla buconasal non vented (sin puerto de exhalación) si se usan ventiladores convencionales
5. Cualquier tipo de mascarilla buconasal
6. No contesto

Respuesta correcta: c). Como se ha comentado previamente, un ventilador convencional de UCI necesita una máscara “non vented”, sin puerto exhalatorio insertado en la misma, pues estos ventiladores funcionan con doble circuito, inspiratorio y espiratorio, por lo que no hay necesidad de lavar el dióxido de carbono a través del puerto exhalatorio. Si se usara una máscara non-vented en un ventilador convencional de UCI, los cuales, gracias al módulo VNI que llevan incorporado, pueden compensar la fuga no intencionada (entre piel y máscara del paciente) no podrán compensar esta fuga extra (fuga intencionada), siendo causa de mayor asincronía paciente-ventilador (Pisani et al, 2012, Sferrazza et al., 2012).

1. En relación a la colocación de la interfaz:
2. El ajuste de la mascarilla ha de permitir el paso de 2 dedos
3. Colocar la interfaz a la cara del paciente y una vez adaptada, iniciar la ventilación, cuando el paciente no esté muy hipoxémico
4. Iniciar la ventilación y después adaptar la interfaz a la cara del paciente
5. Todas son ciertas
6. No contesto

Respuesta correcta: d). La estrategia más eficaz para prevenir lesiones faciales es no apretar excesivamente la máscara. Se recomienda que el arnés se ajuste permitiendo el paso de dos dedos entre máscara y piel del paciente (Pisani et al., 2012, Nava et al., 2009, Sferrazza et al., 2012). Si el paciente está severamente hipoxémico, primero iniciar la ventilación y después ajustar la máscara, para no aumentar el ansia de aire que el paciente padece (Medina et al., 2009).

1. Los cuidados enfermeros durante la VNI son los siguientes:
2. Asegurar la permeabilidad de la vía aérea humidificando secreciones, proteger la piel, prevenir la aparición de conjuntivitis
3. Fisioterapia respiratoria
4. Ajustar frecuentemente la interfaz per corregir fugas excesivas
5. a y c son ciertas
6. todas son ciertas
7. No contesto

Respuesta correcta: e). Humidificar durante la VNI se relaciona con mayor fluidificación de la secreciones, con lo que aumentaran las posibilidades de éxito de la VNI (Gosselink et al., 2008, Holland et al., 2007, Nava and Hill, 2009). Proteger la piel con apósitos y/o hidratándola y monitorizar la correcta posición de la máscara disminuirá el riesgo de intolerancia a la misma y se disminuirá la fuga no intencionada, en consecuencia, mayor sincronía paciente-ventilador y menor conjuntivitis por fuga directa de aire hacia los ojos (Medina et al., 2009, Pisani et al., 2012, Sferrazza et al., 2012). La fisioterapia respiratoria es necesaria para movilizar secreciones, además de técnicas que aumenten el flujo espiratorio para conseguir expectorarlas (Gosselink et al., 2008).

1. La talla adecuada de la mascarilla buconasal se mide de la siguiente forma:
2. Los límites han de caer justo por encima del puente nasal, por debajo del labio inferior y por los laterales, al costado de los surcos nasogenianos
3. Si la duda está entre dos tallas consecutivas, por ejemplo mediana y pequeña, siempre escoger la más pequeña
4. La mascarilla debe incluir parte de la barbilla, hasta casi por debajo el maxilar inferior
5. a y b son ciertas
6. No contesto

Respuesta correcta: d). Las indicaciones correctas son las de la respuesta a); el maxilar nunca debe incluirse dentro de la máscara, y ante la duda, para disminuir la reinhalación, siempre la talla más pequeña (Medina et al., 2009).

Bibliografía

Bello, G., De Pascale, G., & Antonelli, M. (2013). Noninvasive ventilation: practical advice. Current opinion in critical care, 19, 1-8.

Burns, K.E., Meade, M.O., Premji, A., & Adhikari, N.K. (2013). Noninvasive positive-pressure ventilation as a weaning strategy for intubated adults with respiratory failure. Cochrane Database Systematic Review, 12, CD004127.

Chandra, D., Stamm, J.A., Taylor, B., Ramos ,R.M., Satterwhite, L., Krishnan, J.A.,…Holguín, F. (2012). Outcomes of noninvasive ventilation for acute exacerbations of chronic obstructive pulmonary disease in the United States, 1998-2008. American journal of respiratory and critical care medicine, 185, 152-159.

Di Marco, F., Centanni, S., Bellone, A., Messinesi, G., Pesci, A., Scala, R.,…Nava, S. (2011). Optimization of ventilator setting by flow and pressure waveforms analysis during noninvasive ventilation for acute exacerbations of COPD: a multicentric randomized controlled trial. Critical Care, 15, R283.

Esquinas Rodriguez, A.M., Scala, R., Soroksky, A., BaHammam, A., de Klerk, A., Valipour, A.,… Holland, A.E. (2012). Clinical review: humidifiers during non-invasive ventilation--key topics and practical implications. Critical Care, 16, 203.

Esteban, A., Frutos-Vivar, F., Muriel, A., Ferguson, N.D., Peñuelas, O., Abraira, V.,…Anzueto, A. (2013). Evolution of mortality over time in patients receiving mechanical ventilation. American journal of respiratory and critical care medicine, 188:220-230.

Gosselink, R., Bott, J., Johnson, M., Dean, E., Nava, S., Norrenberg, M.,…Vincent, J.L. (2008). Physiotherapy for adult patients with critical illness: recommendations of the European Respiratory Society and European Society of Intensive Care Medicine Task Force on Physiotherapy for Critically Ill Patients. Intensive Care Medicine, 34, 1188-1199

Hilbert, G., Clouzeau, B., Nam Bui, H., & Vargas, F. (2012). Sedation during non-invasive ventilation. Minerva Anestesiologica, 78, 842-846.

Hill, N.S. (2009). Where should noninvasive ventilation be delivered? Respiratory Care, 54, 62-70.

Keenan, S.P., Sinuff, T., Burns, K.E., Muscedere, J., Kutsogiannis, J., Mehta, S.,… Dodek, P. Canadian Critical Care Trials Group/Canadian Critical Care Society Non-invasive Ventilation Guidelines Group. (2011). Clinical practice guidelines for the use of noninvasive positive-pressure ventilation and noninvasive continuous positive airway pressure in the acute care setting. Canadian Medical Association journal, 183, E195-214.

Kelly, C.R., Higgins, A.R., & Chandra, S. (2015). Noninvasive Positive-Pressure Ventilation. New England Journal of Medicine, 373, 1279.

Lellouche, F., L'Her, E., Abroug, F., Deye, N., Rodriguez, P.O., Rabbat, A.,… Brochard, L. (2014). Impact of the humidification device on intubation rate during noninvasive ventilation with ICU ventilators: results of a multicenter randomized controlled trial. Intensive Care Medicine, 40, 211-9.

Louis, B., Leroux, K., Isabey, D., Fauroux, B., & Lofaso, F. (2010). Effect of manufacturer-inserted mask leaks on ventilator performance. The European Respiratory Journal; 35, 627-636.

Medina, A., Pons, M., & Martinon-Torres, F. (2009). Noninvasive Ventilation in Pediatrics (2nd ed.). Barcelona: Ergon. Retrieved from http://www.efccna.org/clinical-practice?id=178

Nava, S. (2013). Behind a mask: tricks, pitfalls, and prejudices for noninvasive ventilation. Respiratory Care, 58, (8):1367-76

Nava, S., Navalesi, P., & Gregoretti, C. (2009). Interfaces and humidification for noninvasive mechanical ventilation. Respiratory Care, 54, 71-84.

Nava, S., & Hill, N. (2009). Non-invasive ventilation in acute respiratory failure. Lancet, 374, 250-259.

Pisani, L., Carlucci, A., & Nava, S. (2012). Interfaces for noninvasive mechanical ventilation: technical aspects and efficiency. Minerva Anestesiologica, 78, 1154-1161.

Plant, P.K., Owen, J.L., & Elliott, M.W. (2000). Early use of non-invasive ventilation for acute exacerbations of chronic obstructive pulmonary disease on general respiratory wards: a multicentre randomised controlled trial. Lancet, 355, 1931-1935

Sferrazza Papa, G.F., Di Marco, F., Akoumianaki, E., & Brochard, L. (2012). Recent advances in interfaces for non-invasive ventilation: from bench studies to practical issues. Minerva Anestesiologica, 78, 1146-1153.
