# Supplementary material
Source: Elsevier journal article supplement (https://www.sciencedirect.com/science/article/pii/S1130239918300592)
Supplement: mmc3 [file S1130239918300592:mmc3.docx]

**Anexo 3:** Formación en VNI en cada unidad de estudio.

|  | **Hospital 1** | **Hospital 2** | | **Hospital 3** | | | | | | **Hospital 4** | | |
| --- | --- | --- | --- | --- | --- | --- | --- | --- | --- | --- | --- | --- |
|  | UCI quirúrgica | UCI poli-valente | Reanimación post-quirúrgica | UCI polivalente | | Urgencias | | | | UCI poli-valente | Urgencias | Salas |
| Destinatarios de la formación (últimos 3 años) | No | No | No | 5 h E | 1 h E | 8 h E | 20 h M | 18 h M | 10 h M | 10 h E (todas las unidades) | | |
| Docentes | - | - | - | Industria | 1 E | 1 M  1 E | 2 M | 2 M  1 E | M | 2 M, 1 E  1 fisioterapeuta | | |
| Metodología  docente | - | - | - | 4 h teóricas (sesión (PPT)  1 h práctica con Puritan Bennett 840® | 1 h práctica sobre fungible para la VNI | 6 h teóricas (sesión PPT)  2 h práctica sobre fungible para la VNI | 16 h teóricas(sesión PPT)  4 h práctica sobre casos clínicos | 16 h teóricas (sesión PPT)  2 h práctica sobre casos clínicos | Todas las horas teóricas | Todas las horas teóricas (sesión PPT) | | |

Abreviaturas: UCI, unidad de cuidados intensivos; VNI: ventilación mecánica no invasiva; E: enfermera; M: médico; PPT, PowerPoint software
